# Supplementary material
Source: publisher site journal article supplement (https://www.dovepress.com/get_supplementary_file.php?f=349637.docx)
Supplement: Supplementary file 1 [file get_supplementary_file.php]

| Supplementary table. Detailed characteristics of patients (n=17) | | | | | | | | | | | | | | |
| --- | --- | --- | --- | --- | --- | --- | --- | --- | --- | --- | --- | --- | --- | --- |
| # | **Age (years)** | **Gender** | **Underlying allergic disease** | **Culprit LA in history** | **Manifestations** | **Latent period (months)†** | **LA used in allergic evaluation** | **SPT with full-concentration LA** | **IDT 1:100** | **IDT 1:10** | **Alternative safe LA** | **Confirmed non-LA drug allergy*** | |
| Skin test positive lidocaine | | | |  | | | | | | | | | |
| 1 | 10 | F | None | Lidocaine | Urticaria-angioedema | 7 | Lidocaine | (-) | (+) | N/A | Articaine | None | |
| 2 | 7 | M | Asthma ± allergic rhinitis | Lidocaine | Urticaria-angioedema | 2 | Lidocaine | (-) | (+) | N/A | Articaine | None | |
| 3 | 6 | F | None | Lidocaine | Urticaria-angioedema | 16 | Lidocaine | (-) | (+) | N/A | Articaine | NSAID | |
| 4 | 13 | F | Asthma ± allergic rhinitis | Lidocaine | Anaphylaxis | 3 | Lidocaine | (-) | (+) | N/A | Articaine | None | |
| 5 | 10 | F | None | Lidocaine | Urticaria-angioedema | 7 | Lidocaine | (-) | (-) | (+) | Articaine | None | |
| Skin test positive mepivacaine | | | | | | | | | | | | | |
| 6 | 8 | M | Cow’s milk allergy | Mepivacaine | Urticaria-angioedema | 5 | Mepivacaine | (-) | (+) | N/A | Articaine | None | |
| 7 | 6 | F | None | Mepivacaine | Urticaria-angioedema | 15 | Mepivacaine | (-) | (+) | N/A | Articaine | None | |
| 8 | 8 | M | None | Mepivacaine | Urticaria-angioedema | 9 | Mepivacaine | (-) | (+) | N/A | Articaine | None | |
| Skin test positive prilocaine | | | | | | | | | | | | | |
| 9 | 6 | M | None | Prilocaine +lidocaine | Urticaria-angioedema | 10 | Prilocaine | (+) | N/A | N/A | Lidocaine  Mepivacaine | None | |
| 10 | 11 | F | Asthma ± allergic rhinitis | Prilocaine | Urticaria-angioedema | 7 | Prilocaine | (-) | (-) | (+) | Articaine | None | |
| 11 | 4 | M | None | Prilocaine | Urticaria-angioedema | 4 | Prilocaine | (-) | (-) | (+) | Articaine | None | |
| Skin test positive with articaine | | | | | | | | | | | | | |
| 12 | 11 | M | None | Articaine | Anaphylaxis | 16 | Articaine | (-) | (+) | N/A | Lidocaine  Mepivacaine | None | |
| Skin test positive with lidocaine and mepivacaine | | | | | | | | | | | | |
| 13 | 8 | F | None | Lidocaine | Itchy throat | 3 | Mepivacaine§ | (-) | (+) | N/A | Articaine | None | |
| Lidocaine | (-) | (+) | N/A |
| > 1 LA positivity in skin test | | | | | | | | | | | | | |
| 14 | 16 | M | None | Lidocaine | Urticaria-angioedema | 9 | Lidocaine | (-) | (-) | (+) | Articaine | None | |
| Mepivacaine | Urticaria | 10 | Mepivacaine | (-) | (-) | (+) |
| 15 | 16 | F | None | Lidocaine | Urticaria-angioedema | 14 | Lidocaine | (-) | (-) | (+) | Articaine | None | |
| Mepivacaine | Urticaria, Flushing | 13 | Mepivacaine | (-) | (-) | (+) |
| Prilocaine | (-) | (-) | (+) |
| 16 | 10 | F | None | Lidocaine | Urticaria-angioedema | 7 | Lidocaine | (-) | (-) | (+) | Articaine | NSAID | |
| Mepivacaine | Urticaria-angioedema | 21 | Mepivacaine | (-) | (-) | (+) |
| 17 | 6 | M | None | Lidocaine + prilocaine | Erythema | 9 | Lidocaine | (-) | (-) | (+) | Articaine | None | |
| Prilocaine | (-) | (-) | (+) |
| Mepivacaine | (-) | (-) | (+) |

F: Female, M: Male, NSAID: Nonsteroidal anti-inflammatory drugs, LA: Local anesthetic, SPT: Skin prick test, IDT: Intradermal test

(-) Negative, (+) Positive, N/A: Not administered

* Confirmed by allergic assessment (skin tests and /or drug provocation tests)

† Time elapsed between last LA reaction and current allergic evaluation

§ No known history of mepivacaine use
